# Supplementary material for: Potential Therapeutic Strategies Targeting CRELD1: Regulation of the Immune Microenvironment in Clear Cell Renal Cell Carcinoma
Source: Research Square preprint supplement (doi:10.21203/rs.3.rs-5881486/v1), 2025-03-25
Supplement: Supplementary file 1 [file 631ec25d4b52cbf74d1b8e95.xlsx]

## Sheet: Sheet1
Protein	PPH0	PPH1	PPH2	PPH3	PPH4
CREL1	0	2.60088e-07	0	0.998146	0.00185405
KDEL2	1.86343e-272	1.17075e-08	1.48578e-266	0.00834316	0.991657
